# Supplementary material
Source: MDPI journal article supplement (https://www.mdpi.com/2073-8994/15/3/731)
Supplement: s1 [file s1 › symmetry-2249444-supplementary.pdf]

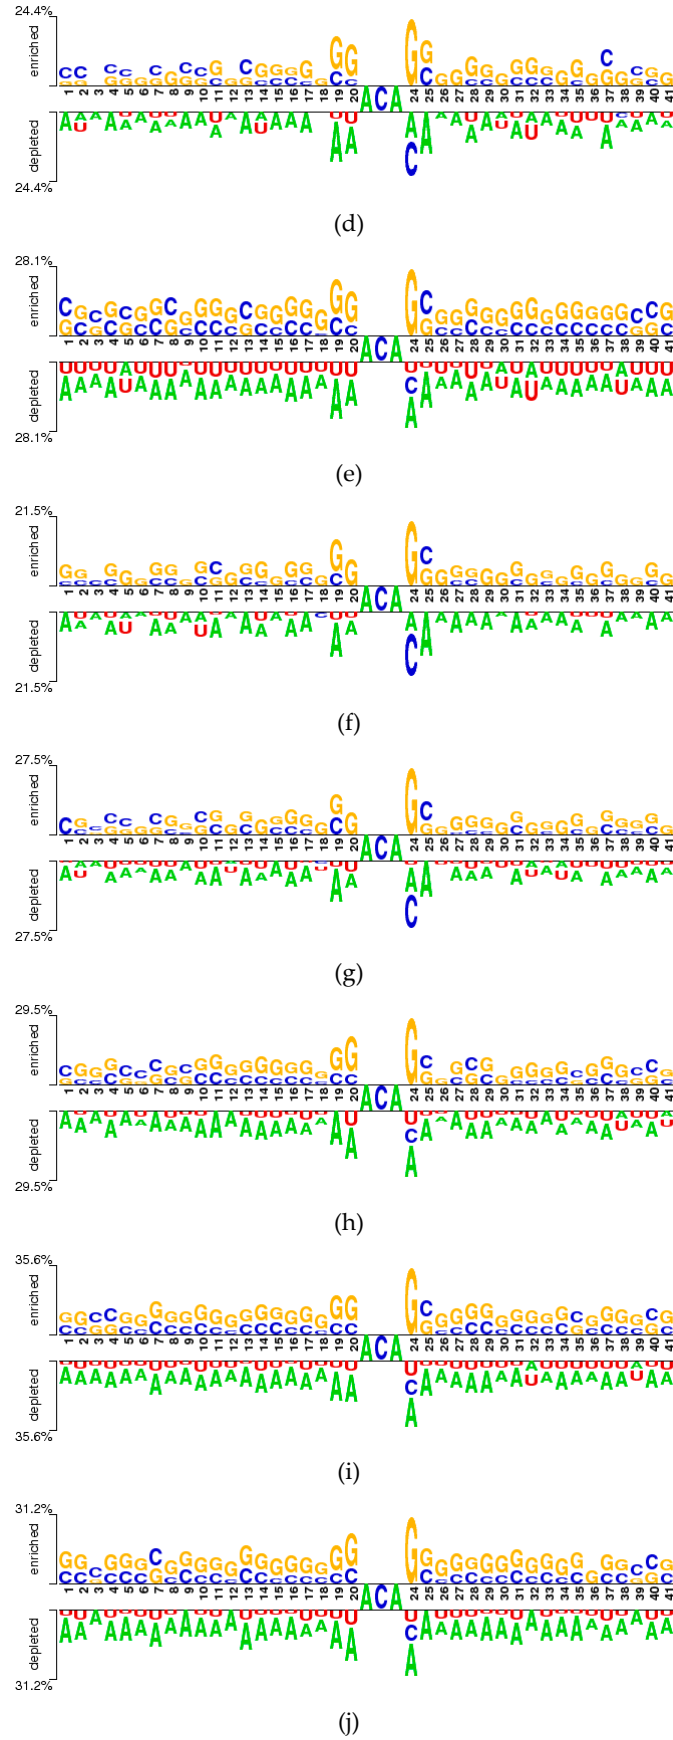

**Figure S1.** The nucleotide composition preferences between positive and negative samples on the remaining 10 datasets. (a) H\_k benchmark dataset; (b) H\_l benchmark dataset; (c) M\_b benchmark dataset;

(d) M\_h benchmark dataset; (e) M\_k benchmark dataset; (f) M\_l benchmark dataset; (g) M\_t benchmark dataset; (h) R\_b benchmark dataset; (i) R\_k benchmark dataset; (j) R\_l benchmark dataset.

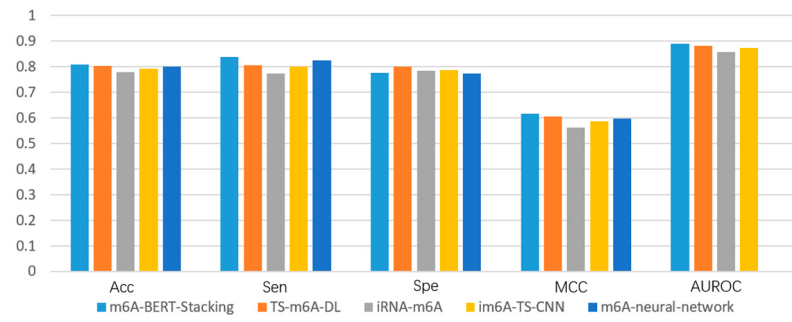

(a)

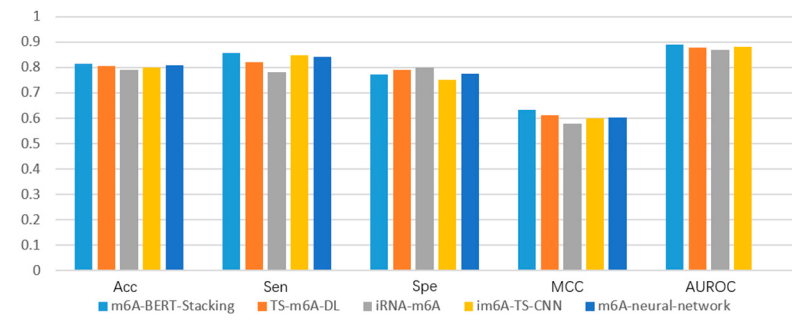

(b)

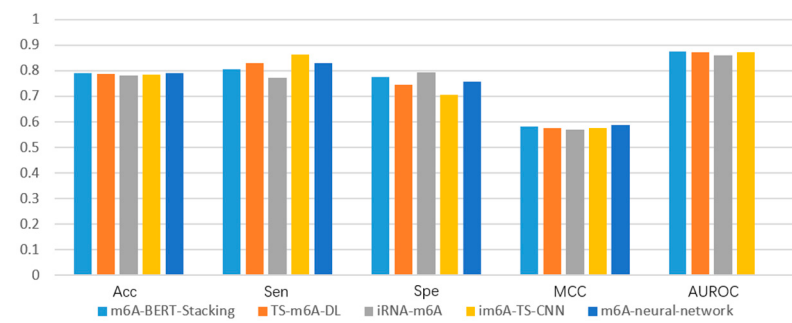

(c)

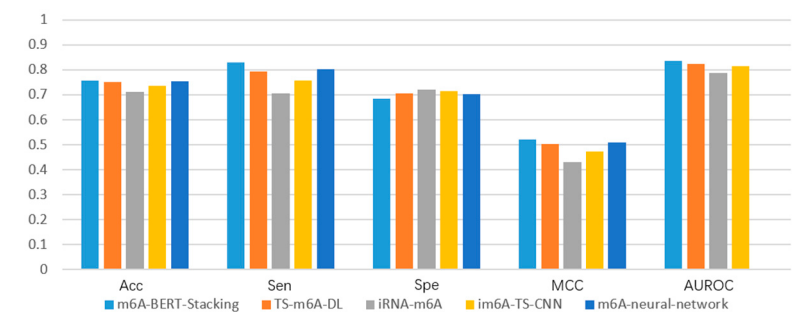

(d)

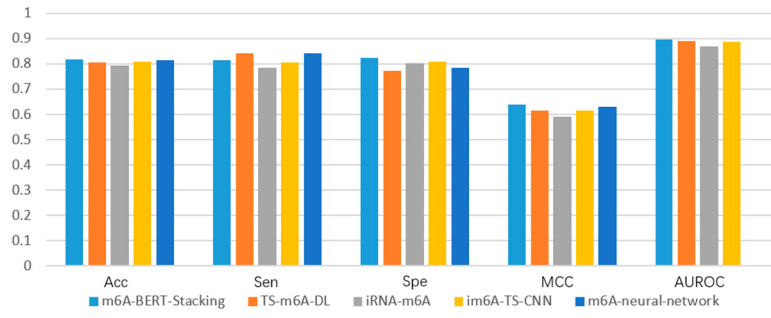

(e)

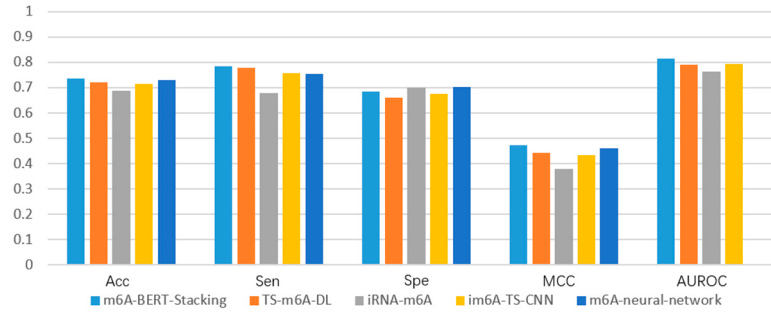

(f)

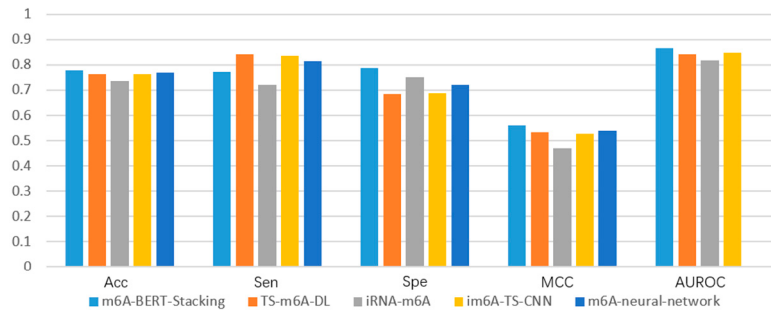

(g)

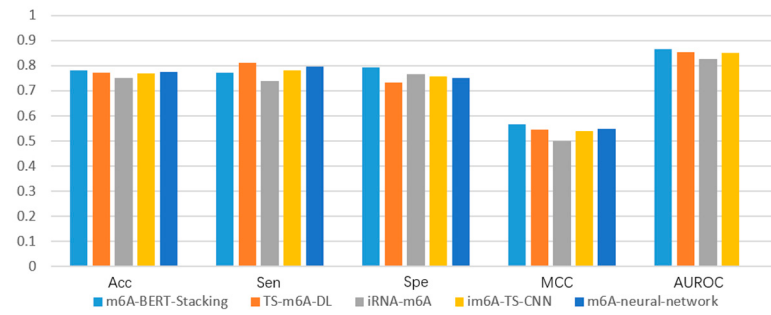

(h)

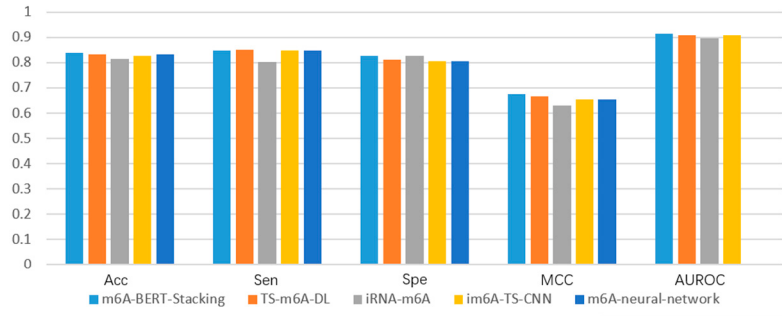

(i)

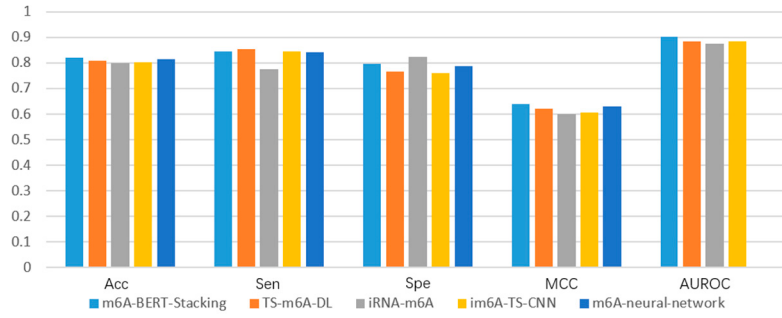

(j)

**Figure S2.** Performance comparison between different models on the remaining 10 datasets. (a) H\_k independent dataset; (b) H\_l independent dataset; (c) M\_b independent dataset; (d) M\_h independent dataset; (e) M\_k independent dataset; (f) M\_l independent dataset; (g) M\_t independent dataset; (h) R\_b independent dataset; (i) R\_k independent dataset; (j) R\_l independent dataset.
